# Supplementary material for: Hydrogen Bonding: Between Strengthening the Crystal Packing and Improving Solubility of Three Haloperidol Derivatives
Source: Molecules. 2016 Jun 1;21(6):719. doi: 10.3390/molecules21060719 (PMC6273816; doi:10.3390/molecules21060719)
Supplement: Supplementary file 1 [file molecules-21-00719-s001.cif]

 
data_CPP02a 
  
_audit_creation_method            SHELXL-97 
_chemical_name_systematic 
; 
 ? 
; 
_chemical_name_common             haloperidol deriv. 
_chemical_source_common           EE 
_chemical_melting_point           ? 
_chemical_formula_moiety          ? 
_chemical_formula_sum 
 'C21 H23.20 Cl0.80 F N O' 
_chemical_formula_weight          352.97 
  
loop_ 
 _atom_type_symbol 
 _atom_type_description 
 _atom_type_scat_dispersion_real 
 _atom_type_scat_dispersion_imag 
 _atom_type_scat_source 
 'C'  'C'   0.0181   0.0091 
 'International Tables Vol C Tables 4.2.6.8 and 6.1.1.4' 
 'H'  'H'   0.0000   0.0000 
 'International Tables Vol C Tables 4.2.6.8 and 6.1.1.4' 
 'N'  'N'   0.0311   0.0180 
 'International Tables Vol C Tables 4.2.6.8 and 6.1.1.4' 
 'O'  'O'   0.0492   0.0322 
 'International Tables Vol C Tables 4.2.6.8 and 6.1.1.4' 
 'F'  'F'   0.0727   0.0534 
 'International Tables Vol C Tables 4.2.6.8 and 6.1.1.4' 
 'Cl'  'Cl'   0.3639   0.7018 
 'International Tables Vol C Tables 4.2.6.8 and 6.1.1.4' 
  
_symmetry_cell_setting            monoclinic 
_symmetry_space_group_name_H-M    P21/c 
  
loop_ 
 _symmetry_equiv_pos_as_xyz 
 'x, y, z' 
 '-x, y+1/2, -z+1/2' 
 '-x, -y, -z' 
 'x, -y-1/2, z-1/2' 
  
_cell_length_a                    15.610(4) 
_cell_length_b                    10.580(2) 
_cell_length_c                    11.034(3) 
_cell_angle_alpha                 90.00 
_cell_angle_beta                  99.579(13) 
_cell_angle_gamma                 90.00 
_cell_volume                      1796.9(8) 
_cell_formula_units_Z             4 
_cell_measurement_temperature     100(2) 
_cell_measurement_reflns_used     4940 
_cell_measurement_theta_min       2.87 
_cell_measurement_theta_max       68.12 
  
_exptl_crystal_description        ? 
_exptl_crystal_colour             ? 
_exptl_crystal_size_max           0.25 
_exptl_crystal_size_mid           0.08 
_exptl_crystal_size_min           0.06 
_exptl_crystal_density_meas       0 
_exptl_crystal_density_diffrn     1.305 
_exptl_crystal_density_method     'not measured' 
_exptl_crystal_F_000              747 
_exptl_absorpt_coefficient_mu     1.752 
_exptl_absorpt_correction_type    multi-scan 
_exptl_absorpt_correction_T_min   0.6685 
_exptl_absorpt_correction_T_max   0.9022 
_exptl_absorpt_process_details    ? 
  
_exptl_special_details 
; 
 mixture of chlorinated and non-chlorinated compound: ratio 80/20 
; 
  
_diffrn_ambient_temperature       100(2) 
_diffrn_radiation_wavelength      1.54178 
_diffrn_radiation_type            CuK\a 
_diffrn_radiation_source         'Incoatec microfocus sealed tube'
_diffrn_radiation_monochromator  'multilayer mirror'
_diffrn_measurement_device_type  'Bruker SMART6000 CCD'
_diffrn_measurement_method       '\w scans'
_diffrn_detector_area_resol_mean  ? 
_diffrn_reflns_number             14999 
_diffrn_reflns_av_R_equivalents   0.0388 
_diffrn_reflns_av_sigmaI/netI     0.0314 
_diffrn_reflns_limit_h_min        -18 
_diffrn_reflns_limit_h_max        18 
_diffrn_reflns_limit_k_min        -12 
_diffrn_reflns_limit_k_max        11 
_diffrn_reflns_limit_l_min        -13 
_diffrn_reflns_limit_l_max        12 
_diffrn_reflns_theta_min          2.87 
_diffrn_reflns_theta_max          68.22 
_reflns_number_total              3281 
_reflns_number_gt                 2764 
_reflns_threshold_expression      >2sigma(I) 
  
_computing_data_collection       'Bruker SMART'
_computing_cell_refinement       'Bruker SMART'
_computing_data_reduction        'Bruker SAINT'
_computing_structure_solution    'SHELXS-97 (Sheldrick, 1990)'
_computing_structure_refinement  'SHELXL-97 (Sheldrick, 1997)'
_computing_molecular_graphics    'Bruker SHELXTL'
_computing_publication_material  ?
  
_refine_special_details 
; 
 Refinement of F^2^ against ALL reflections.  The weighted R-factor wR and 
 goodness of fit S are based on F^2^, conventional R-factors R are based 
 on F, with F set to zero for negative F^2^. The threshold expression of 
 F^2^ > 2sigma(F^2^) is used only for calculating R-factors(gt) etc. and is 
 not relevant to the choice of reflections for refinement.  R-factors based 
 on F^2^ are statistically about twice as large as those based on F, and R- 
 factors based on ALL data will be even larger. 
; 
  
_refine_ls_structure_factor_coef  Fsqd 
_refine_ls_matrix_type            full 
_refine_ls_weighting_scheme       calc 
_refine_ls_weighting_details 
 'calc w=1/[\s^2^(Fo^2^)+(0.0433P)^2^+0.6571P] where P=(Fo^2^+2Fc^2^)/3' 
_atom_sites_solution_primary      direct 
_atom_sites_solution_secondary    difmap 
_atom_sites_solution_hydrogens    geom 
_refine_ls_hydrogen_treatment     mixed 
_refine_ls_extinction_method      none 
_refine_ls_extinction_coef        ? 
_refine_ls_number_reflns          3281 
_refine_ls_number_parameters      227 
_refine_ls_number_restraints      0 
_refine_ls_R_factor_all           0.0453 
_refine_ls_R_factor_gt            0.0356 
_refine_ls_wR_factor_ref          0.0936 
_refine_ls_wR_factor_gt           0.0882 
_refine_ls_goodness_of_fit_ref    1.028 
_refine_ls_restrained_S_all       1.028 
_refine_ls_shift/su_max           0.018 
_refine_ls_shift/su_mean          0.003 
  
loop_ 
 _atom_site_label 
 _atom_site_type_symbol 
 _atom_site_fract_x 
 _atom_site_fract_y 
 _atom_site_fract_z 
 _atom_site_U_iso_or_equiv 
 _atom_site_adp_type 
 _atom_site_occupancy 
 _atom_site_symmetry_multiplicity 
 _atom_site_calc_flag 
 _atom_site_refinement_flags 
 _atom_site_disorder_assembly 
 _atom_site_disorder_group 
C1 C -0.10849(10) 0.50132(14) 0.39116(13) 0.0235(3) Uani 1 1 d . . . 
H1 H -0.0820 0.5561 0.3401 0.028 Uiso 1 1 calc R . . 
C2 C -0.17261(10) 0.54801(15) 0.45196(13) 0.0260(3) Uani 1 1 d . . . 
H2 H -0.1902 0.6340 0.4440 0.031 Uiso 1 1 calc R . . 
C3 C -0.20989(10) 0.46548(16) 0.52436(14) 0.0300(4) Uani 1 1 d . . . 
C4 C -0.18450(12) 0.34068(16) 0.54177(16) 0.0348(4) Uani 1 1 d . . . 
H4 H -0.2107 0.2869 0.5940 0.042 Uiso 1 1 calc R . . 
C5 C -0.12003(11) 0.29644(15) 0.48113(15) 0.0293(4) Uani 1 1 d . . . 
H5 H -0.1012 0.2112 0.4923 0.035 Uiso 1 1 calc R . . 
C6 C -0.08219(9) 0.37530(14) 0.40362(13) 0.0228(3) Uani 1 1 d . . . 
C7 C -0.01487(9) 0.32210(14) 0.33563(14) 0.0232(3) Uani 1 1 d . . . 
O8 O 0.00633(7) 0.21131(10) 0.34802(11) 0.0325(3) Uani 1 1 d . . . 
C9 C 0.02432(9) 0.40821(14) 0.25051(14) 0.0237(3) Uani 1 1 d . . . 
H9A H 0.0490 0.4833 0.2973 0.028 Uiso 1 1 calc R . . 
H9B H -0.0224 0.4378 0.1847 0.028 Uiso 1 1 calc R . . 
C10 C 0.09487(10) 0.34638(14) 0.19194(15) 0.0263(3) Uani 1 1 d . . . 
H10A H 0.0714 0.2688 0.1484 0.032 Uiso 1 1 calc R . . 
H10B H 0.1435 0.3214 0.2571 0.032 Uiso 1 1 calc R . . 
C11 C 0.12905(10) 0.43405(14) 0.10147(14) 0.0249(3) Uani 1 1 d . . . 
H11A H 0.0818 0.4521 0.0320 0.030 Uiso 1 1 calc R . . 
H11B H 0.1469 0.5151 0.1429 0.030 Uiso 1 1 calc R . . 
N12 N 0.20314(8) 0.37967(11) 0.05368(11) 0.0218(3) Uani 1 1 d . . . 
C13 C 0.28411(9) 0.40089(14) 0.13997(13) 0.0242(3) Uani 1 1 d . . . 
H13A H 0.2780 0.3669 0.2217 0.029 Uiso 1 1 calc R . . 
H13B H 0.2952 0.4928 0.1488 0.029 Uiso 1 1 calc R . . 
C14 C 0.36045(9) 0.33759(15) 0.09587(13) 0.0233(3) Uani 1 1 d . . . 
H14A H 0.3505 0.2452 0.0898 0.028 Uiso 1 1 calc R . . 
H14B H 0.4140 0.3528 0.1559 0.028 Uiso 1 1 calc R . . 
C15 C 0.37177(9) 0.38976(14) -0.02966(13) 0.0217(3) Uani 1 1 d . . . 
H15 H 0.3820 0.4828 -0.0197 0.026 Uiso 1 1 calc R . . 
C16 C 0.28551(9) 0.37227(15) -0.11762(13) 0.0247(3) Uani 1 1 d . . . 
H16A H 0.2900 0.4109 -0.1981 0.030 Uiso 1 1 calc R . . 
H16B H 0.2738 0.2809 -0.1309 0.030 Uiso 1 1 calc R . . 
C17 C 0.21087(10) 0.43276(15) -0.06650(13) 0.0250(3) Uani 1 1 d . . . 
H17A H 0.2206 0.5251 -0.0585 0.030 Uiso 1 1 calc R . . 
H17B H 0.1560 0.4187 -0.1243 0.030 Uiso 1 1 calc R . . 
C18 C 0.44746(9) 0.33515(14) -0.08275(13) 0.0229(3) Uani 1 1 d . B . 
C19 C 0.48556(10) 0.21932(15) -0.04708(14) 0.0285(3) Uani 1 1 d . . . 
H19 H 0.4636 0.1704 0.0131 0.034 Uiso 1 1 calc R . . 
C20 C 0.55519(11) 0.17392(17) -0.09786(15) 0.0316(4) Uani 1 1 d . B . 
H20 H 0.5811 0.0951 -0.0717 0.038 Uiso 1 1 calc R . . 
C21 C 0.58658(10) 0.24397(16) -0.18658(14) 0.0288(4) Uani 1 1 d . . . 
H21B H 0.6340 0.2127 -0.2217 0.035 Uiso 0.20 1 calc PR A 2 
C22 C 0.54971(10) 0.35910(15) -0.22491(14) 0.0279(3) Uani 1 1 d . B . 
H22 H 0.5713 0.4070 -0.2861 0.034 Uiso 1 1 calc R . . 
C23 C 0.48092(10) 0.40325(15) -0.17261(13) 0.0257(3) Uani 1 1 d . . . 
H23 H 0.4556 0.4824 -0.1986 0.031 Uiso 1 1 calc R B . 
F24 F -0.27514(7) 0.50844(10) 0.58096(10) 0.0425(3) Uani 1 1 d . . . 
Cl25 Cl 0.67317(3) 0.18916(5) -0.25195(4) 0.03142(14) Uani 0.80 1 d P B 1 
  
loop_ 
 _atom_site_aniso_label 
 _atom_site_aniso_U_11 
 _atom_site_aniso_U_22 
 _atom_site_aniso_U_33 
 _atom_site_aniso_U_23 
 _atom_site_aniso_U_13 
 _atom_site_aniso_U_12 
C1 0.0236(7) 0.0228(8) 0.0239(7) -0.0003(6) 0.0040(6) -0.0014(6) 
C2 0.0266(8) 0.0246(8) 0.0266(8) -0.0037(6) 0.0040(6) 0.0015(6) 
C3 0.0282(8) 0.0337(9) 0.0307(8) -0.0116(7) 0.0124(7) -0.0027(7) 
C4 0.0419(10) 0.0291(9) 0.0377(9) -0.0033(7) 0.0190(8) -0.0088(7) 
C5 0.0340(9) 0.0217(8) 0.0339(8) -0.0013(6) 0.0104(7) -0.0037(7) 
C6 0.0213(7) 0.0215(7) 0.0252(7) -0.0016(6) 0.0026(6) -0.0023(6) 
C7 0.0199(7) 0.0204(8) 0.0290(8) 0.0003(6) 0.0028(6) -0.0006(6) 
O8 0.0327(6) 0.0198(6) 0.0482(7) 0.0064(5) 0.0163(5) 0.0047(5) 
C9 0.0224(7) 0.0192(7) 0.0301(8) 0.0012(6) 0.0064(6) 0.0010(6) 
C10 0.0234(7) 0.0214(7) 0.0360(8) 0.0038(6) 0.0101(6) 0.0027(6) 
C11 0.0240(7) 0.0213(8) 0.0305(8) 0.0023(6) 0.0080(6) 0.0042(6) 
N12 0.0187(6) 0.0229(6) 0.0245(6) 0.0020(5) 0.0054(5) 0.0011(5) 
C13 0.0240(7) 0.0254(8) 0.0231(7) 0.0014(6) 0.0038(6) -0.0008(6) 
C14 0.0211(7) 0.0263(8) 0.0221(7) 0.0016(6) 0.0030(6) 0.0002(6) 
C15 0.0217(7) 0.0202(8) 0.0233(7) 0.0005(6) 0.0042(6) -0.0011(6) 
C16 0.0236(7) 0.0291(8) 0.0215(7) 0.0004(6) 0.0038(6) -0.0003(6) 
C17 0.0236(7) 0.0270(8) 0.0245(7) 0.0033(6) 0.0040(6) 0.0014(6) 
C18 0.0205(7) 0.0264(8) 0.0210(7) -0.0034(6) 0.0015(6) -0.0042(6) 
C19 0.0297(8) 0.0310(9) 0.0257(7) 0.0038(6) 0.0077(6) 0.0025(7) 
C20 0.0306(8) 0.0331(9) 0.0312(8) 0.0002(7) 0.0059(7) 0.0069(7) 
C21 0.0208(7) 0.0397(9) 0.0264(8) -0.0084(7) 0.0055(6) -0.0040(7) 
C22 0.0261(8) 0.0330(9) 0.0255(8) -0.0032(6) 0.0065(6) -0.0091(7) 
C23 0.0251(7) 0.0255(8) 0.0269(7) -0.0015(6) 0.0049(6) -0.0051(6) 
F24 0.0438(6) 0.0415(6) 0.0491(6) -0.0139(5) 0.0281(5) -0.0029(5) 
Cl25 0.0254(2) 0.0362(3) 0.0361(3) -0.0024(2) 0.01536(19) 0.00225(19) 
  
_geom_special_details 
; 
 All esds (except the esd in the dihedral angle between two l.s. planes) 
 are estimated using the full covariance matrix.  The cell esds are taken 
 into account individually in the estimation of esds in distances, angles 
 and torsion angles; correlations between esds in cell parameters are only 
 used when they are defined by crystal symmetry.  An approximate (isotropic) 
 treatment of cell esds is used for estimating esds involving l.s. planes. 
; 
  
loop_ 
 _geom_bond_atom_site_label_1 
 _geom_bond_atom_site_label_2 
 _geom_bond_distance 
 _geom_bond_site_symmetry_2 
 _geom_bond_publ_flag 
C1 C2 1.386(2) . ? 
C1 C6 1.395(2) . ? 
C1 H1 0.9500 . ? 
C2 C3 1.376(2) . ? 
C2 H2 0.9500 . ? 
C3 F24 1.3586(18) . ? 
C3 C4 1.383(2) . ? 
C4 C5 1.380(2) . ? 
C4 H4 0.9500 . ? 
C5 C6 1.394(2) . ? 
C5 H5 0.9500 . ? 
C6 C7 1.499(2) . ? 
C7 O8 1.2194(18) . ? 
C7 C9 1.509(2) . ? 
C9 C10 1.515(2) . ? 
C9 H9A 0.9900 . ? 
C9 H9B 0.9900 . ? 
C10 C11 1.523(2) . ? 
C10 H10A 0.9900 . ? 
C10 H10B 0.9900 . ? 
C11 N12 1.4661(19) . ? 
C11 H11A 0.9900 . ? 
C11 H11B 0.9900 . ? 
N12 C17 1.4634(19) . ? 
N12 C13 1.4676(18) . ? 
C13 C14 1.516(2) . ? 
C13 H13A 0.9900 . ? 
C13 H13B 0.9900 . ? 
C14 C15 1.528(2) . ? 
C14 H14A 0.9900 . ? 
C14 H14B 0.9900 . ? 
C15 C18 1.518(2) . ? 
C15 C16 1.534(2) . ? 
C15 H15 1.0000 . ? 
C16 C17 1.518(2) . ? 
C16 H16A 0.9900 . ? 
C16 H16B 0.9900 . ? 
C17 H17A 0.9900 . ? 
C17 H17B 0.9900 . ? 
C18 C19 1.390(2) . ? 
C18 C23 1.395(2) . ? 
C19 C20 1.389(2) . ? 
C19 H19 0.9500 . ? 
C20 C21 1.381(2) . ? 
C20 H20 0.9500 . ? 
C21 C22 1.383(2) . ? 
C21 Cl25 1.7345(16) . ? 
C21 H21B 0.9500 . ? 
C22 C23 1.382(2) . ? 
C22 H22 0.9500 . ? 
C23 H23 0.9500 . ? 
  
loop_ 
 _geom_angle_atom_site_label_1 
 _geom_angle_atom_site_label_2 
 _geom_angle_atom_site_label_3 
 _geom_angle 
 _geom_angle_site_symmetry_1 
 _geom_angle_site_symmetry_3 
 _geom_angle_publ_flag 
C2 C1 C6 121.16(14) . . ? 
C2 C1 H1 119.4 . . ? 
C6 C1 H1 119.4 . . ? 
C3 C2 C1 117.66(14) . . ? 
C3 C2 H2 121.2 . . ? 
C1 C2 H2 121.2 . . ? 
F24 C3 C2 118.45(15) . . ? 
F24 C3 C4 118.36(15) . . ? 
C2 C3 C4 123.19(15) . . ? 
C5 C4 C3 118.15(15) . . ? 
C5 C4 H4 120.9 . . ? 
C3 C4 H4 120.9 . . ? 
C4 C5 C6 120.80(15) . . ? 
C4 C5 H5 119.6 . . ? 
C6 C5 H5 119.6 . . ? 
C5 C6 C1 118.98(14) . . ? 
C5 C6 C7 119.08(13) . . ? 
C1 C6 C7 121.93(13) . . ? 
O8 C7 C6 120.31(13) . . ? 
O8 C7 C9 121.30(14) . . ? 
C6 C7 C9 118.39(12) . . ? 
C7 C9 C10 113.80(12) . . ? 
C7 C9 H9A 108.8 . . ? 
C10 C9 H9A 108.8 . . ? 
C7 C9 H9B 108.8 . . ? 
C10 C9 H9B 108.8 . . ? 
H9A C9 H9B 107.7 . . ? 
C9 C10 C11 112.06(12) . . ? 
C9 C10 H10A 109.2 . . ? 
C11 C10 H10A 109.2 . . ? 
C9 C10 H10B 109.2 . . ? 
C11 C10 H10B 109.2 . . ? 
H10A C10 H10B 107.9 . . ? 
N12 C11 C10 112.34(12) . . ? 
N12 C11 H11A 109.1 . . ? 
C10 C11 H11A 109.1 . . ? 
N12 C11 H11B 109.1 . . ? 
C10 C11 H11B 109.1 . . ? 
H11A C11 H11B 107.9 . . ? 
C17 N12 C11 111.36(11) . . ? 
C17 N12 C13 109.70(12) . . ? 
C11 N12 C13 110.63(12) . . ? 
N12 C13 C14 111.24(12) . . ? 
N12 C13 H13A 109.4 . . ? 
C14 C13 H13A 109.4 . . ? 
N12 C13 H13B 109.4 . . ? 
C14 C13 H13B 109.4 . . ? 
H13A C13 H13B 108.0 . . ? 
C13 C14 C15 110.30(12) . . ? 
C13 C14 H14A 109.6 . . ? 
C15 C14 H14A 109.6 . . ? 
C13 C14 H14B 109.6 . . ? 
C15 C14 H14B 109.6 . . ? 
H14A C14 H14B 108.1 . . ? 
C18 C15 C14 115.29(12) . . ? 
C18 C15 C16 111.56(12) . . ? 
C14 C15 C16 107.94(12) . . ? 
C18 C15 H15 107.2 . . ? 
C14 C15 H15 107.2 . . ? 
C16 C15 H15 107.2 . . ? 
C17 C16 C15 111.17(12) . . ? 
C17 C16 H16A 109.4 . . ? 
C15 C16 H16A 109.4 . . ? 
C17 C16 H16B 109.4 . . ? 
C15 C16 H16B 109.4 . . ? 
H16A C16 H16B 108.0 . . ? 
N12 C17 C16 111.04(12) . . ? 
N12 C17 H17A 109.4 . . ? 
C16 C17 H17A 109.4 . . ? 
N12 C17 H17B 109.4 . . ? 
C16 C17 H17B 109.4 . . ? 
H17A C17 H17B 108.0 . . ? 
C19 C18 C23 117.59(14) . . ? 
C19 C18 C15 123.38(13) . . ? 
C23 C18 C15 119.03(13) . . ? 
C20 C19 C18 121.15(15) . . ? 
C20 C19 H19 119.4 . . ? 
C18 C19 H19 119.4 . . ? 
C21 C20 C19 119.61(15) . . ? 
C21 C20 H20 120.2 . . ? 
C19 C20 H20 120.2 . . ? 
C20 C21 C22 120.72(15) . . ? 
C20 C21 Cl25 120.55(13) . . ? 
C22 C21 Cl25 118.73(12) . . ? 
C20 C21 H21B 119.6 . . ? 
C22 C21 H21B 119.6 . . ? 
Cl25 C21 H21B 0.9 . . ? 
C23 C22 C21 118.85(15) . . ? 
C23 C22 H22 120.6 . . ? 
C21 C22 H22 120.6 . . ? 
C22 C23 C18 122.07(15) . . ? 
C22 C23 H23 119.0 . . ? 
C18 C23 H23 119.0 . . ? 
  
loop_ 
 _geom_torsion_atom_site_label_1 
 _geom_torsion_atom_site_label_2 
 _geom_torsion_atom_site_label_3 
 _geom_torsion_atom_site_label_4 
 _geom_torsion 
 _geom_torsion_site_symmetry_1 
 _geom_torsion_site_symmetry_2 
 _geom_torsion_site_symmetry_3 
 _geom_torsion_site_symmetry_4 
 _geom_torsion_publ_flag 
C6 C1 C2 C3 -0.5(2) . . . . ? 
C1 C2 C3 F24 -177.56(13) . . . . ? 
C1 C2 C3 C4 2.1(2) . . . . ? 
F24 C3 C4 C5 178.06(14) . . . . ? 
C2 C3 C4 C5 -1.6(2) . . . . ? 
C3 C4 C5 C6 -0.6(2) . . . . ? 
C4 C5 C6 C1 2.1(2) . . . . ? 
C4 C5 C6 C7 -177.60(14) . . . . ? 
C2 C1 C6 C5 -1.5(2) . . . . ? 
C2 C1 C6 C7 178.11(13) . . . . ? 
C5 C6 C7 O8 0.1(2) . . . . ? 
C1 C6 C7 O8 -179.59(14) . . . . ? 
C5 C6 C7 C9 179.00(13) . . . . ? 
C1 C6 C7 C9 -0.7(2) . . . . ? 
O8 C7 C9 C10 -4.1(2) . . . . ? 
C6 C7 C9 C10 176.96(12) . . . . ? 
C7 C9 C10 C11 176.81(13) . . . . ? 
C9 C10 C11 N12 174.31(12) . . . . ? 
C10 C11 N12 C17 154.90(13) . . . . ? 
C10 C11 N12 C13 -82.82(15) . . . . ? 
C17 N12 C13 C14 -60.58(15) . . . . ? 
C11 N12 C13 C14 176.19(12) . . . . ? 
N12 C13 C14 C15 59.67(16) . . . . ? 
C13 C14 C15 C18 178.97(12) . . . . ? 
C13 C14 C15 C16 -55.57(16) . . . . ? 
C18 C15 C16 C17 -177.24(12) . . . . ? 
C14 C15 C16 C17 55.11(16) . . . . ? 
C11 N12 C17 C16 -177.76(12) . . . . ? 
C13 N12 C17 C16 59.44(16) . . . . ? 
C15 C16 C17 N12 -58.06(17) . . . . ? 
C14 C15 C18 C19 21.7(2) . . . . ? 
C16 C15 C18 C19 -101.86(16) . . . . ? 
C14 C15 C18 C23 -158.68(13) . . . . ? 
C16 C15 C18 C23 77.74(17) . . . . ? 
C23 C18 C19 C20 0.9(2) . . . . ? 
C15 C18 C19 C20 -179.51(14) . . . . ? 
C18 C19 C20 C21 -0.9(2) . . . . ? 
C19 C20 C21 C22 0.3(2) . . . . ? 
C19 C20 C21 Cl25 -179.73(12) . . . . ? 
C20 C21 C22 C23 0.2(2) . . . . ? 
Cl25 C21 C22 C23 -179.74(11) . . . . ? 
C21 C22 C23 C18 -0.2(2) . . . . ? 
C19 C18 C23 C22 -0.3(2) . . . . ? 
C15 C18 C23 C22 -179.97(13) . . . . ? 
  
_diffrn_measured_fraction_theta_max    0.994 
_diffrn_reflns_theta_full              68.22 
_diffrn_measured_fraction_theta_full   0.994 
_refine_diff_density_max    0.211 
_refine_diff_density_min   -0.200 
_refine_diff_density_rms    0.042 
